# Supplementary material
Source: PubMed Central journal article supplement (PMC6159993)
Supplement: jci-128-121735-s272.pdf [file jci-128-121735-s272.pdf]

## SUPPLEMENTAL INFORMATIONS

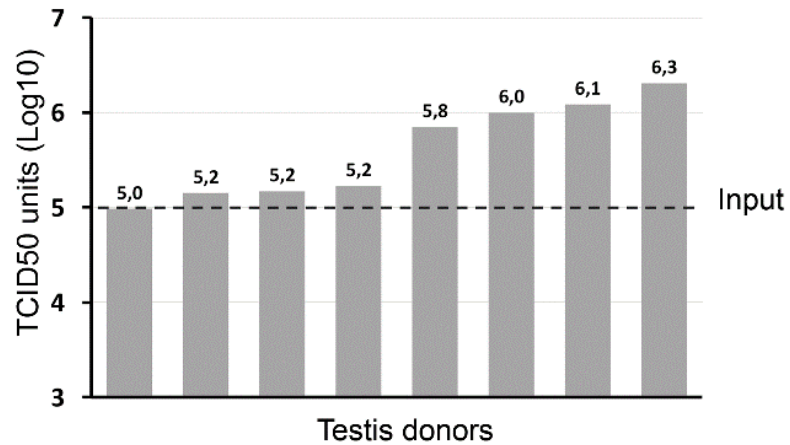

**Figure S1 Cumulative ZIKV production by testis explants over a 9 day-culture period.** Viral titer values presented in Figure 1B (viral release over a 3 day-culture period measured at day 3, day 6 and day 9 p.i.) were summed to obtain cumulative TCID<sub>50</sub> units production over the 9 day-culture period for each testis explants of the eight donors. Dotted line represents the TCID<sub>50</sub> input used for infection.

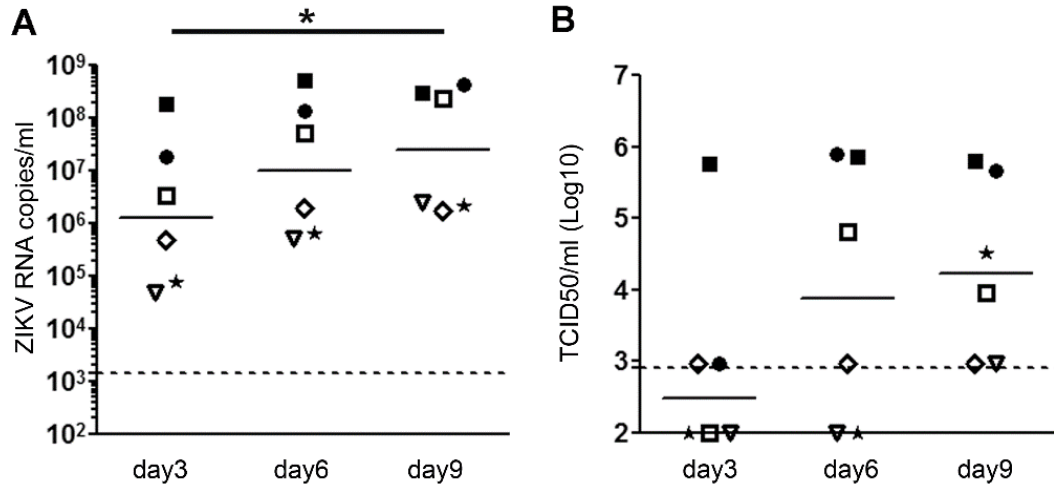

**Figure S2 Replication of ZIKV H/PF/2013 in human testicular tissue.** Human testis explants from 6 donors were ex vivo-infected overnight with  $10^5$  TCID<sub>50</sub> (corresponding to  $8 \cdot 10^7$  vRNA copies) of a low-passage Asian ZIKV strain isolated in 2013 in French Polynesia (H/PF/2013). Explants were thoroughly washed and then cultured on inserts in 1 ml of medium/well for 9 days, with media fully removed and changed every 3 days. Each of the time points (day 3, day 6, day 9) represents de novo viral release over a 3-day-culture period. A) ZIKV RNA release over a 3-day-culture period at day 3, day 6 and day 9 detected by RT-qPCR; B) Viral titers determined by infectivity assay of 3-day-culture period tissue supernatants on VeroE6 cells. Each symbol represents a different donor (same symbol/donor throughout the manuscript figures). Dotted lines represent the detection limit of the assays. Mock-infected explants were always below detection level. Bars represent median. \* $P < 0,05$  (Friedman-Dunns non-parametric comparison).

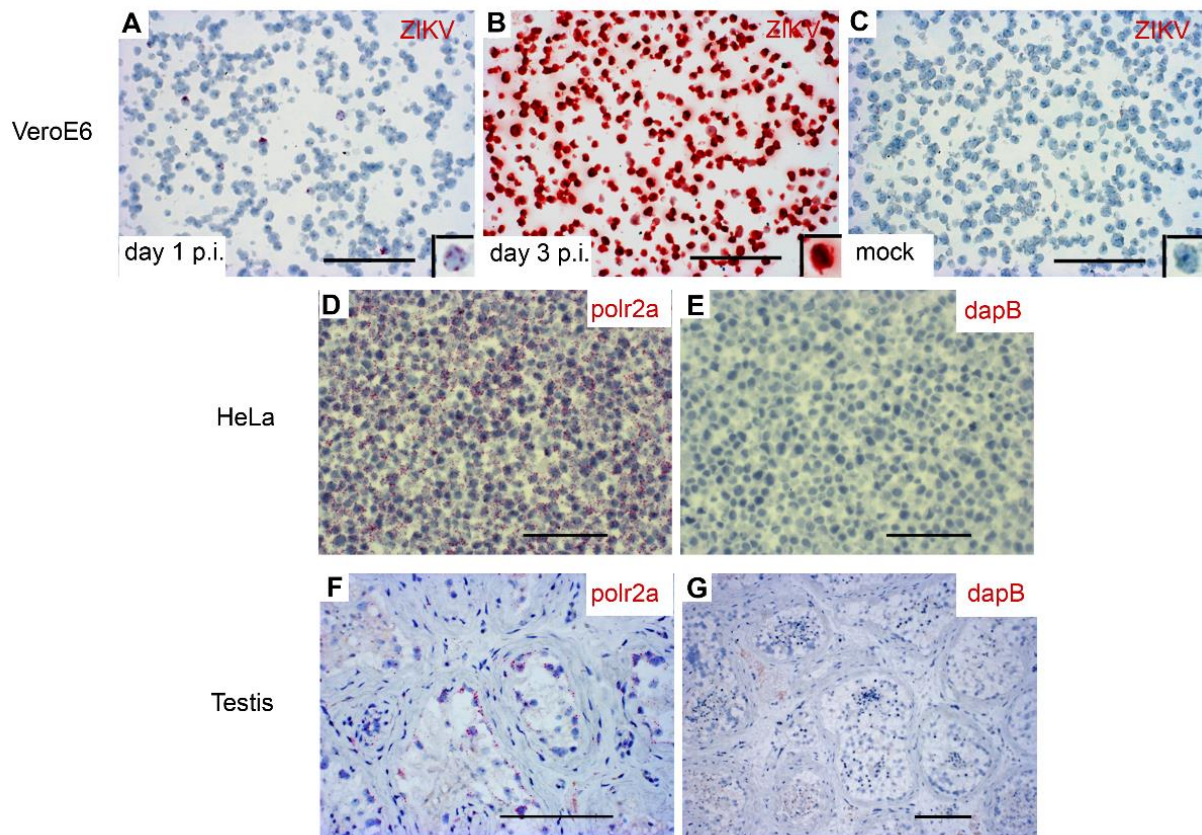

**Figure S3 RNAscope in situ hybridization (ISH) set-up.** Paraffin-embedded cell pellets (A-E) and testis tissue (F-G) underwent ISH using different probes (indicated in red). A) Vero E6 cells infected with ZIKV for 1 day showing specific punctuate red dot staining; B) Vero E6 cells infected with ZIKV for 3 days, showing intense clusters of red dots covering the cells, reflecting high infection level; C) mock-infected Vero E6; D-E) HeLa cells; F-G) Testicular tissue sections. A-C) VeroE6 cells were stained for ZIKV RNA for positive (A,B) and negative (C) controls of ISH; D, F) ISH positive control using a probe targeting human polr2a gene; E, G) ISH negative control using a probe targeting bacterial gene dapB. Scale bars=100 $\mu$ m.

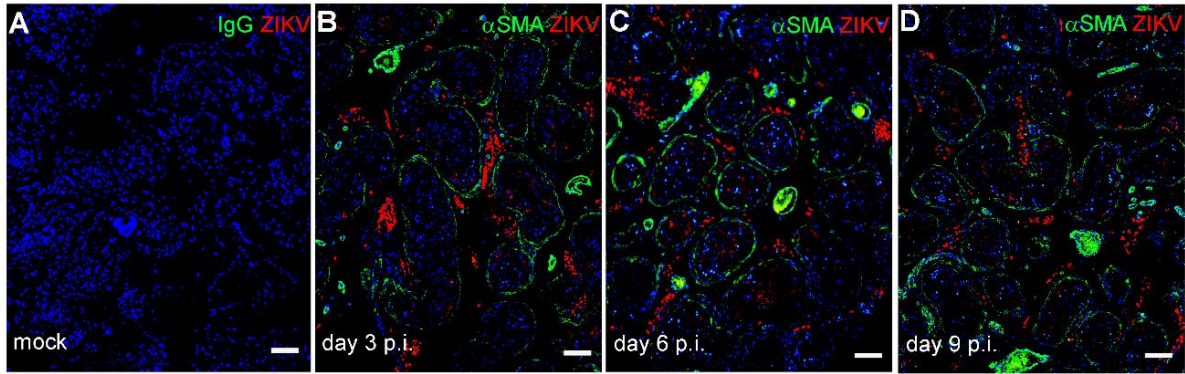

**Figure S4 Localization of ZIKV infected cells in testicular explants at different time points of infection.** RNAscope in situ hybridization for ZIKV RNA coupled to immunofluorescence for  $\alpha$ SMA (which labels peritubular cells, thus delineating seminiferous tubules, and smooth muscle cells in blood vessels walls) in mock-infected (A) and day-3 (B), day-6 (C), day-9 (D) ZIKV-infected testis explants. Nuclei are stained in blue. Scale bars=100  $\mu$ m.

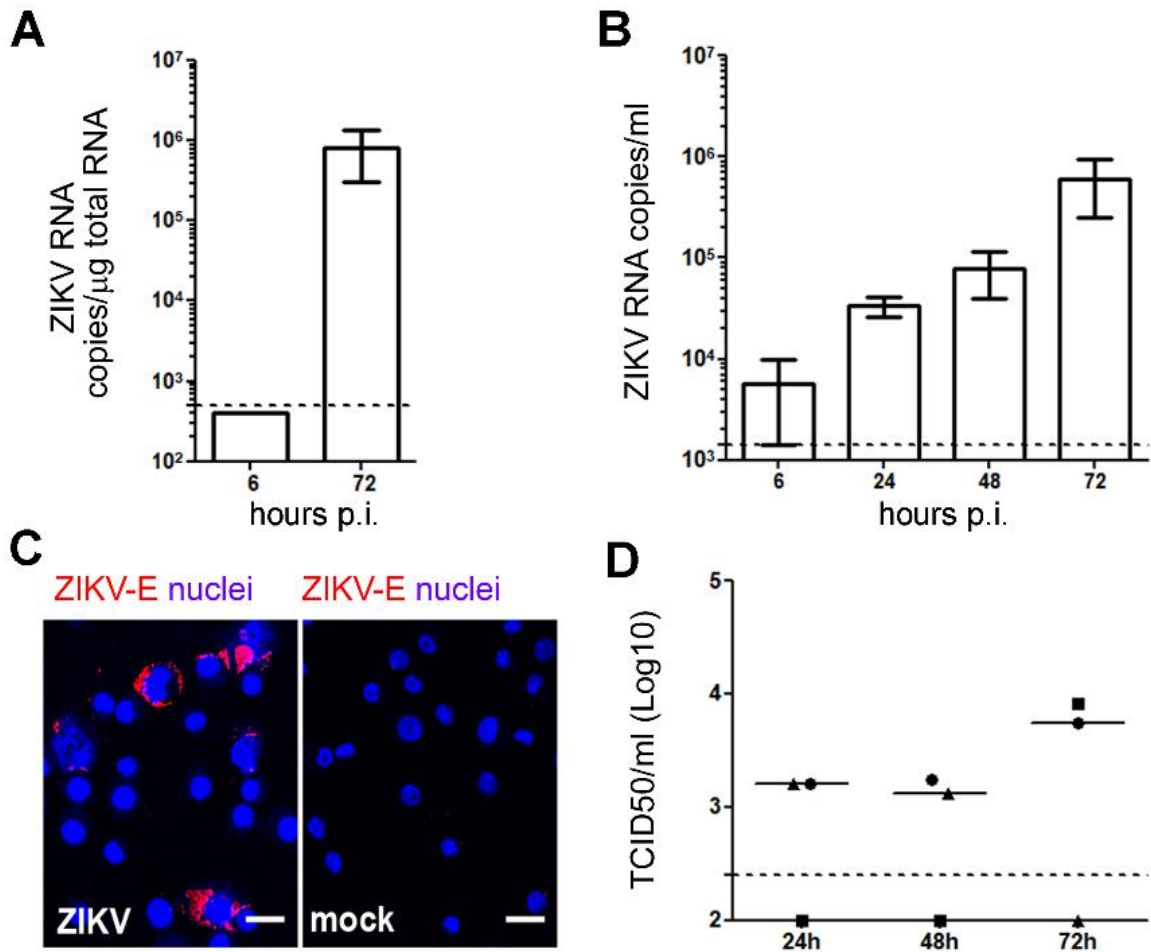

**Figure S5 ZIKV infection of testicular germ cells T-cam2.** The human testicular germ cell line Tcam-2 was infected for 2h with ZIKV (MOI 1, corresponding to  $1.43 \times 10^5$  TCID<sub>50</sub> units/ml/0.1 million cells). Viral inoculum was washed away and cells trypsinized to remove residual virus. Incubated media and cells were collected at the indicated time points post-infection. ZIKV RNA detected by RT-qPCR in cells (A) and culture supernatants (B). Mean $\pm$  SEM of 3 independent experiments is represented. C) Immunofluorescence against ZIKV envelope (ZIKV-E) protein. Nuclei are stained in blue. Scale bars=20  $\mu$ m. D) Viral titers determined by infectivity assay of tissue supernatants on VeroE6 cells. Each dot represents a different experiment. Bars represent median values. Dotted lines indicate detection limits.

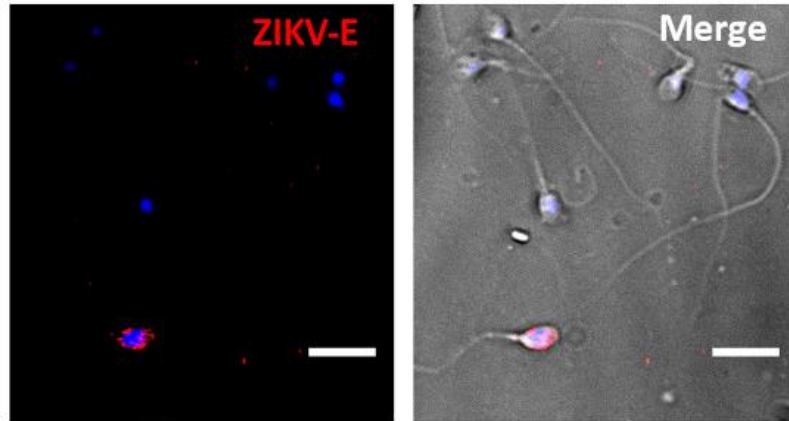

**Figure S6 Detection of ZIKV in spermatozoa.** Semen smear obtained from an infected donor 11 days post-symptoms onset stained with anti-ZIKV-E antibody. Nuclei are stained in blue. Merged with brightfield image to visualize cell's morphology. Scale bars=20 $\mu$ m.

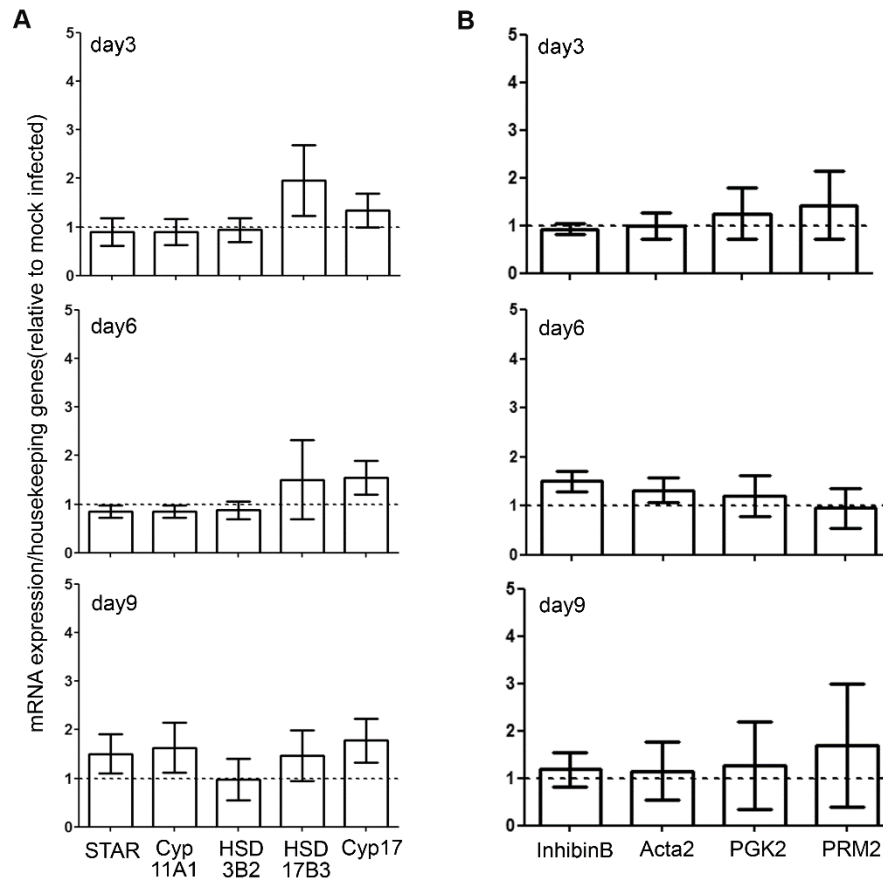

**Figure S7 Testicular gene expression in infected versus mock-infected testis explants.** Mock-infected and ZIKV-infected testis explants from 6 donors were collected at day 3, 6 and 9 post-infection and assessed by RT-qPCR for relative expression of A) steroidogenic enzymes mRNAs and B) specific transcripts for Sertoli cells (Inhibin B), peritubular myoid cells (Acta2), early meiotic (PGK2) and post-meiotic (PRM2) germ cells. Graphs represent mean  $\pm$  SEM for 6 testis donors. Dotted lines show basal expression levels in mock-infected explants.

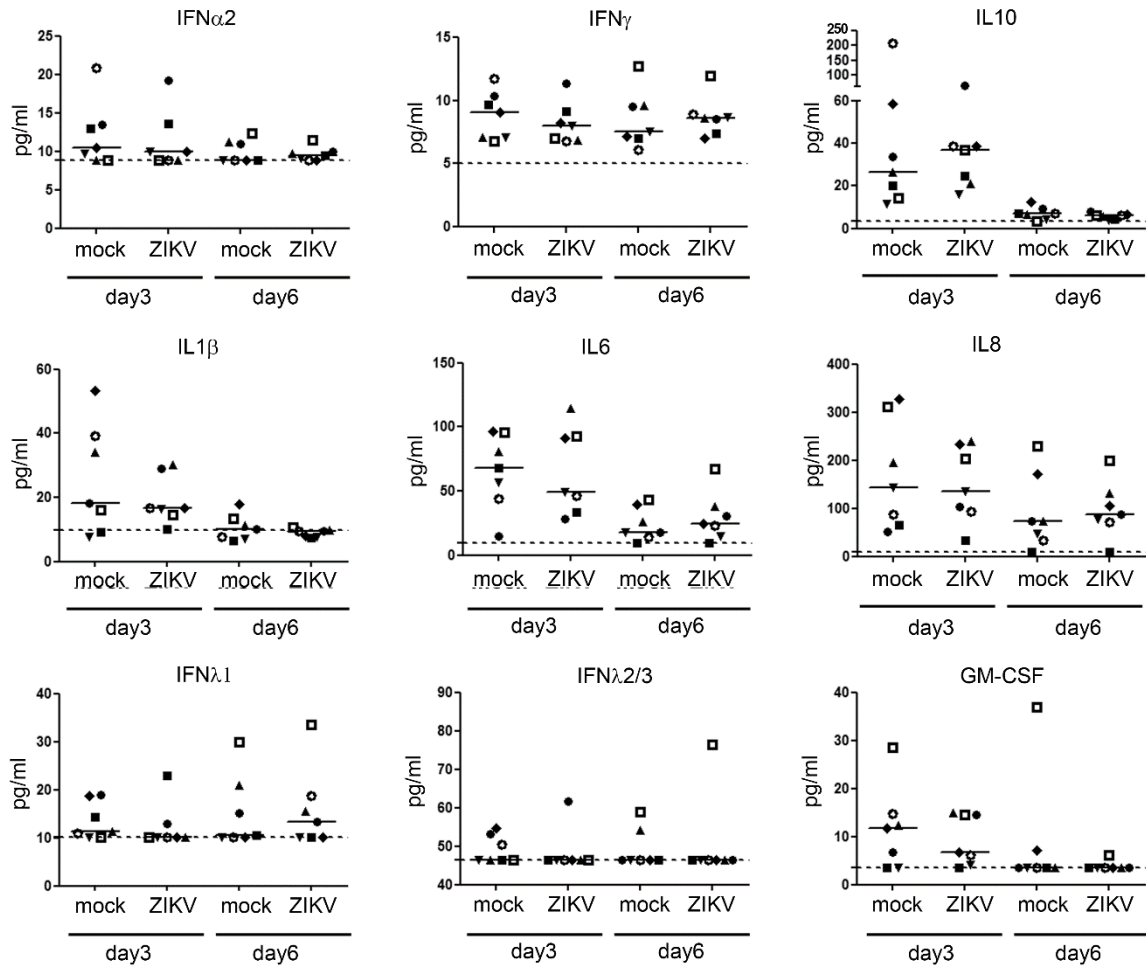

**Figure S8 Cytokines secretion in ZIKV-infected and mock-infected testis explants.** Levels of cytokines in supernatants of testis explants from 7 donors were measured by flow-cytometer based multiplex assay (Legendplex). TNF $\alpha$  and IL-12p70 concentration levels are not shown as they were below the detection threshold. Dotted lines indicate quantification limits. Each symbol represents a different donor. Bars represent median values.



Spearman correlation

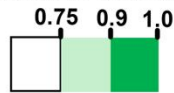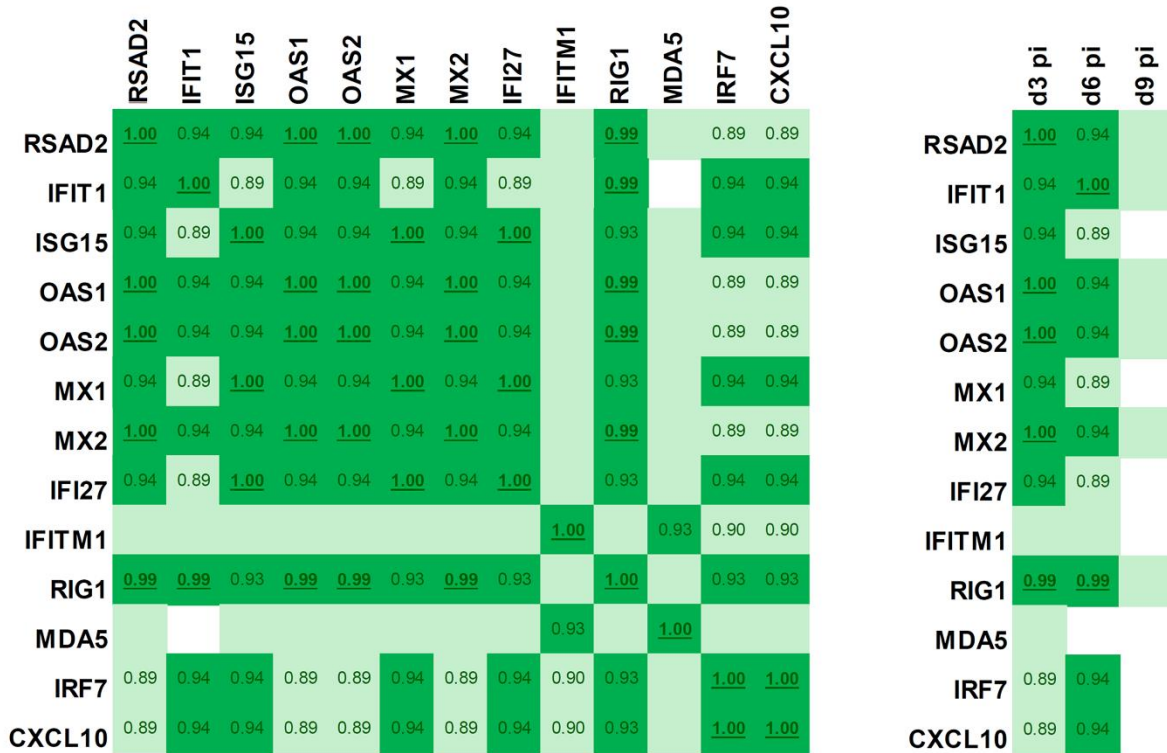

**Figure S9 Gene expression correlations in infected human testis.** Heatmap of Spearman correlation of day 9 gene expression fold increase with viral loads in supernatants at days 3, 6 and 9 post-infection (d3, d6, d9 p.i.) (left panel) or between each pair of upregulated (right panel) genes from 6 testis explants donors (T1 to T6). Cells with a Spearman rho value higher than 0.75 and 0.9 are indicated with light and dark green respectively. Rho values are reported in cells when correlation is statistically significant ( $p < 0.05$ , regular font;  $p < 0.01$  bold underlined).

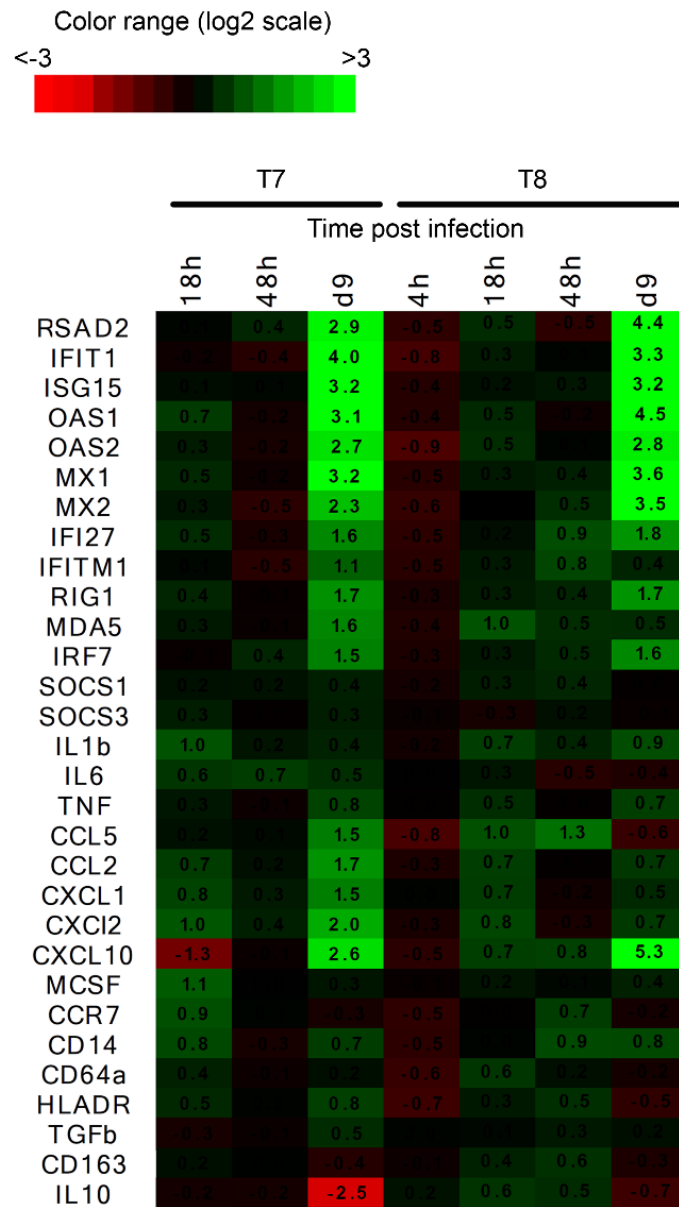

**Figure S10 ZIKV triggering of gene expression at early time points post-infection.** To investigate the expression before day 3 post-infection of IFN and other genes involved in pathogen sensing, antiviral response, inflammation, chemoattraction and immunotolerance, RT-qPCR was performed on testis explants from two donors (T7 and T8) exposed to  $10^5$  TCID<sub>50</sub> of ZIKV for 18h and 48h. Testis explants from one donor (T8) were also collected at 4h post-infection. As a control for the ability of ZIKV to induce gene expression in these testis donors, infected explants were screened in RT-qPCR at day 9 post-infection. Heat map shows log<sub>2</sub> transformed expression ratios between ZIKV infected and time-matched mock-infected controls. On the scale bar, green indicates up-regulation and red, down-regulation compared to mock-infected controls Type I ( $\alpha_1$ ,  $\alpha_2$ ,  $\alpha_4$ ,  $\beta$ ,  $\lambda_2$ ,  $\lambda_3$ ) and II ( $\gamma$ ) IFN mRNAs were below quantification threshold (not shown).

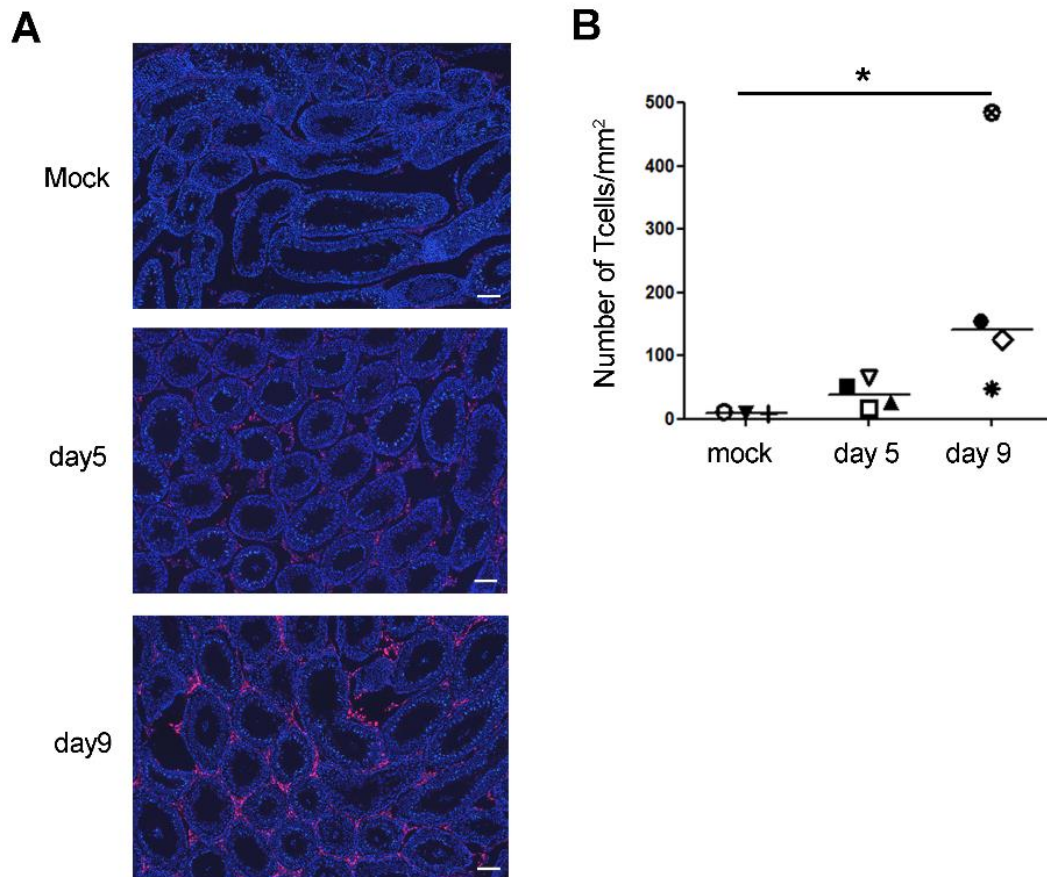

**Figure S11 Immune cells infiltrates in ZIKV-infected mouse testis.** (A) Detection of T lymphocytes in mock-infected and ZIKV-infected mouse testis at day 5 and day 9 post-infection by immunofluorescence with anti-CD3 antibody. Nuclei are stained in blue. Scale bars=100 $\mu$ m. (B) Quantification of CD3+ cells in mock-infected, day 5 infected and day 9 infected mouse testis. Each symbol represent a different animal. \*  $P < 0,05$  (Kruskal–Wallis-Dunn's test non-parametric comparison).

**Supplementary Table 1.** Primers used for the relative quantification of innate immune response effector genes**Human genes**

| <b>Gene</b>    | <b>Forward primer (5'-3')</b> | <b>Reverse primer (5'-3')</b> |
|----------------|-------------------------------|-------------------------------|
| <b>ACTb</b>    | TACAGCTTCACCACCACGG           | TGCTCGAAGTCCAGGGCGA           |
| <b>CCL2</b>    | AGCAGCAAGTGTCCCAAAGAAG        | AGTCTTCGGAGTTTGGGTTTGC        |
| <b>CCL5</b>    | TGCTGCTTTGCCTACATTGCC         | TTTCGGGTGACAAAGACGACTG        |
| <b>CCR7</b>    | AGTGGGGAGACTTCTTGGCTTG        | AAAACGATGGAGGGAGGGGTTT        |
| <b>CD14</b>    | GTACTCCCGCCTCAAGGAAGT         | AAAGTGCAAGTCTGTGGCTTC         |
| <b>CD163</b>   | TGAGCCACACTGAAAAGGAAAATG      | GCTCCATTCAATAGTCCAGGTCTTC     |
| <b>CD64a</b>   | ACACATCAGCAGGAATATCTGTAC      | GAGCAACTTTGTTTCACAGCTCAGG     |
| <b>CXCL1</b>   | TTCACAGTGTGTGGTCAACATTTT      | CCCTTTGTTCTAAGCCAGAAACAC      |
| <b>CXCL10</b>  | GTGGCATTCAAGGAGTACCTCTC       | CGTGGACAAAATTGGCTTGCAG        |
| <b>CXCL2</b>   | CACAGTGTGTGGTCAACATTTCTC      | TGCTCTAACACAGAGGGAAACAC       |
| <b>HLADR</b>   | CCTTGACCTCAGTCAAAGCAGTC       | AGAGTACGGAGCAATCGAAGAGG       |
| <b>IFI27</b>   | AGTCACTGGGAGCAACTGGAC         | CTGGCATGGTTCTTCTCTCTGC        |
| <b>IFIT1</b>   | CTTGAGCCTCCTTGGGTTTCGTC       | GTTCTCAAAGTCAGCAGCCAGTC       |
| <b>IFITM1</b>  | CCGTGAAGTCTAGGGACAGGAAG       | CACAGAGCCGAATACCAGTAACAG      |
| <b>IFNa1</b>   | ACCCACAGCCTGGATAACAG          | TCCATCAGACAGGAGGAAGG          |
| <b>IFNa2</b>   | AAACTGGTTCAACATGGAATGATT      | CATGAGTCTTTGAAATGGCAGATC      |
| <b>IFNa4</b>   | CCGTGCTGGTGTCTCAGCTA          | GCTGTGGGTCTGAGGCAGAT          |
| <b>IFNb</b>    | CAGAAGCTCCTGTGGCAATTG         | TCCTCAGGGATGTCAAAGTTCA        |
| <b>IFNL1</b>   | GAATTGGGACCTGAGGCTTCTC        | GATGTGGTGCAGGGTGTGAAGG        |
| <b>IFNL2,3</b> | CTGCCACATAGCCCAGTTCAAG        | CGACTCTTCTAAGGCATCTTTGGC      |
| <b>IL10</b>    | GCTGGAGGACTTTAAGGGTTACCTG     | GGGTCTTGGTTCTCAGCTTGGG        |
| <b>IL1b</b>    | CACGATGCACCTGTACGATCAC        | ACATGGAGAACACCACTCGTTGC       |
| <b>IL6</b>     | TGTTTCTGCCAGTGCCTCTT          | ACACAGACAGCCACTCACCTC         |
| <b>IRF7</b>    | CGCTATACCATCTACCTGGGCTTC      | GCTGCTATCCAGGGAAGACACAC       |
| <b>ISG15</b>   | CGAACCTCTGAGCATCCTGGTG        | CCTCGAAGGTCAGCCAGAACAG        |
| <b>MCSF</b>    | GATGGAGACCTCGTGCCAAATTAC      | TATCTCTGAAGCGCATGGTGTCC       |
| <b>MDA5</b>    | AAAGCACTGCAAAAAGAAGTGTGC      | TGCACCATCATTGTTCCCAAG         |
| <b>MX1</b>     | CGTTAGCCGTGGTGATTTAGCAG       | ATCCTTCAATCCCGCCAGCTC         |
| <b>MX2</b>     | CCAGTAATGAGTCTTCGGTTTCTC      | GAGACGTTTGGTGGTTTCCAAGAAG     |
| <b>OAS1</b>    | GATGTGCTGCCTGCCTTTGATG        | TCGATGAGCTTGACATAGATTTGGG     |
| <b>OAS2</b>    | CTGAGCCAGTTGCAGAAAACAG        | CAGAAGATGCCAACCAACCGG         |
| <b>RSAD2</b>   | ACATGACGGAACAGATCAAAGCAC      | AGCATCTTCTCCACAATTCTCAC       |
| <b>RIG1</b>    | GACACAGAGAGTCTGGCAAAGAG       | CTTTGTCTGGCATCTGGAACACC       |
| <b>SOCS1</b>   | GCAGACCCCTTCTCACCTCTTG        | GAGGTAGGAGGTGCGAGTTCAG        |
| <b>SOCS3</b>   | TAAGGGGTAAAGGGCGCAAAGG        | CCTGGTTGGCTTCTTGTGCTTG        |
| <b>TGFb</b>    | TCCTGGCGATACCTCAGCAAC         | GGCGAAAGCCCTCAATTTCCC         |
| <b>TNFa</b>    | CTGTAGCCCATGTTGTAGCAAACC      | TCTCTCAGCTCCACGCCATTG         |

## Mouse genes

| Gene           | Forward primer (5'-3')    | Reverse primer (5'-3')   |
|----------------|---------------------------|--------------------------|
| <b>ACTb</b>    | TGGATCAGCAAGCAGGAGTACG    | AAAACGCAGCTCAGTAACAGTCC  |
| <b>CD14</b>    | GACCATGGAGCGTGTGCTTG      | TTGAAAGCGCTGGACCAATCTG   |
| <b>CD19</b>    | CCGAGGAAACCTGACCATCGAG    | ACTGGGACTATCCATCCACCAG   |
| <b>CD20</b>    | TTCAAACCTTCCAAGCCGTATGTTG | AGAAGGCAGAGATCAGCATCGC   |
| <b>CD3E</b>    | CTGTATCACTCTGGGCTTGCTG    | GCTCCTTGTTTTGCCCTCTGG    |
| <b>CD3G</b>    | TATCTCATTGCGGGACAGGATGG   | CTGGTCATATTCCCGGTCTTG    |
| <b>CD4</b>     | TCTGACTCTGGACAAAGGGACAC   | GGGTCAGTCTCATCTTGGGAGAG  |
| <b>CD68</b>    | CTTCGGGCCATGTTTCTCTTGC    | AGAGGGGCTGGTAGGTTGATTG   |
| <b>CD8a</b>    | TGGCCCTTCTGCTGTCCTTG      | ACTAGCGGCCTGGGACATTTG    |
| <b>CD8b</b>    | TCAAGACGGCCCTTCTCAGTATC   | TTGTAGGAAGGACATCAACCACAG |
| <b>CXCL10</b>  | GTCTGAGTCCCTCGCTCAAGTGG   | TAGGGAGGACAAGGAGGGTGTG   |
| <b>FOXP3</b>   | AGTTCCTTCCCAGAGTTCTTCCAC  | AAGGGTGGCATAGGTGAAAGGG   |
| <b>IFIT1</b>   | GGCATCACCTTCTCTGGCTAC     | TTTCGGGATGTCTCAGTTGGG    |
| <b>IFITM1</b>  | AGCCTATGCCTACTCCGTGAAG    | CAGACAACGATGACGACGATGG   |
| <b>IFNa1</b>   | ATTTCCCTGACCCAGGAAGATG    | AGGAAGACAGGGCTCTCCAGAC   |
| <b>IFNa2</b>   | TCCTCGTGATGCTGATAGTGATGAG | CCTTCAGGCAGGAGAGAAAGGG   |
| <b>IFNa4</b>   | TGTCTGCTACTTGGAATGCAACTC  | AGAGGAGGTTCTGCATCACAC    |
| <b>IFNb1</b>   | GATGAACTCCACCAGCAGACAG    | GACATCTCCACGTCATCTTTCC   |
| <b>IFNg</b>    | GGAGGAACTGGCAAAGGATGG     | TGTTGCTGATGGCCTGATTGTC   |
| <b>IFNL2,3</b> | AGGATTGCCACATTGCTCAGTTC   | AGCAGCCTTCTCTCGATGGC     |
| <b>IL1b</b>    | AAAGCTCTCCACCTCAATGGAC    | TTGTCGTTGCTTGGTTCTCCTTG  |
| <b>IL6</b>     | TTCCTACCCCAATTTCCAATGCTC  | TTGGATGGTCTTGGTCCTTAGCC  |
| <b>ISG15</b>   | GGAACAAGTCCACGAAGACCAG    | CTGGGGCTTTAGGCCATACTCC   |
| <b>MDA5</b>    | ACATGAAACCAGAGGAGTATGCAC  | TGGATTGTCGTTGTATTGCTTTGC |
| <b>MX1</b>     | CTTTCTGGTCGCTGTGCAATG     | TACAAAGGGCTTGCTTGCTTCC   |
| <b>OAS1b</b>   | TGCTGAAGGAGGTGAAGTTTGATG  | TGGCGTAGAATTGTTGGTTAGGC  |
| <b>RSAD2</b>   | GTGGTGCAGGGATTACAAGGTG    | TTAGGAGGCACTGGAAAACCTTC  |
| <b>RIG1</b>    | GCAGAACAAACCGGGCAACAG     | GTTATCTCCGCTGGCTCTGAATG  |
| <b>TNFa</b>    | GTAGCCACGTCGTAGCAAAC      | TCTTTGAGATCCATGCCGTTGG   |
